# Supplementary material for: Sestrin-2, a repressor of PDGFRβ signalling, promotes cigarette-smoke-induced pulmonary emphysema in mice and is upregulated in individuals with COPD
Source: PubMed Central journal article supplement (PMC3820261; doi:10.1242/dmm.013482), 2013-08-29
Supplement: supp_013482_DMM013482.pdf [file supp_013482_DMM013482.pdf]

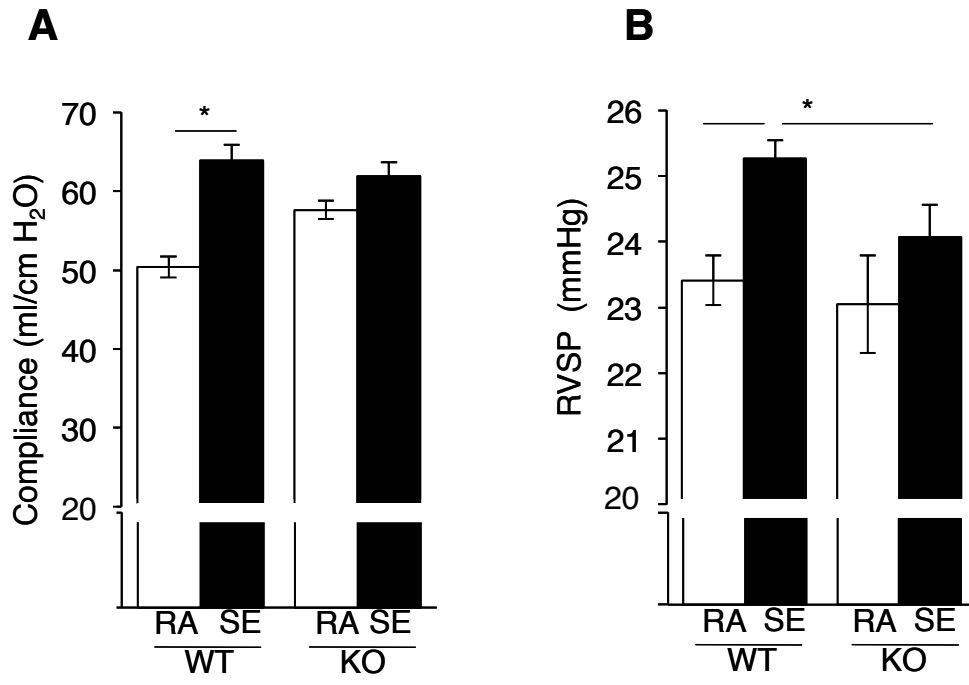

**Fig. S1:** Protection of *Sesn2* KO mice against cigarette smoke. **A.** Compliance. **B.** Right ventricular systolic blood pressure (n = 7-14 mice per group). RA, room air; SE, smoke exposed; WT, wild type; KO, *Sesn2* knockout. \*p < 0.05.

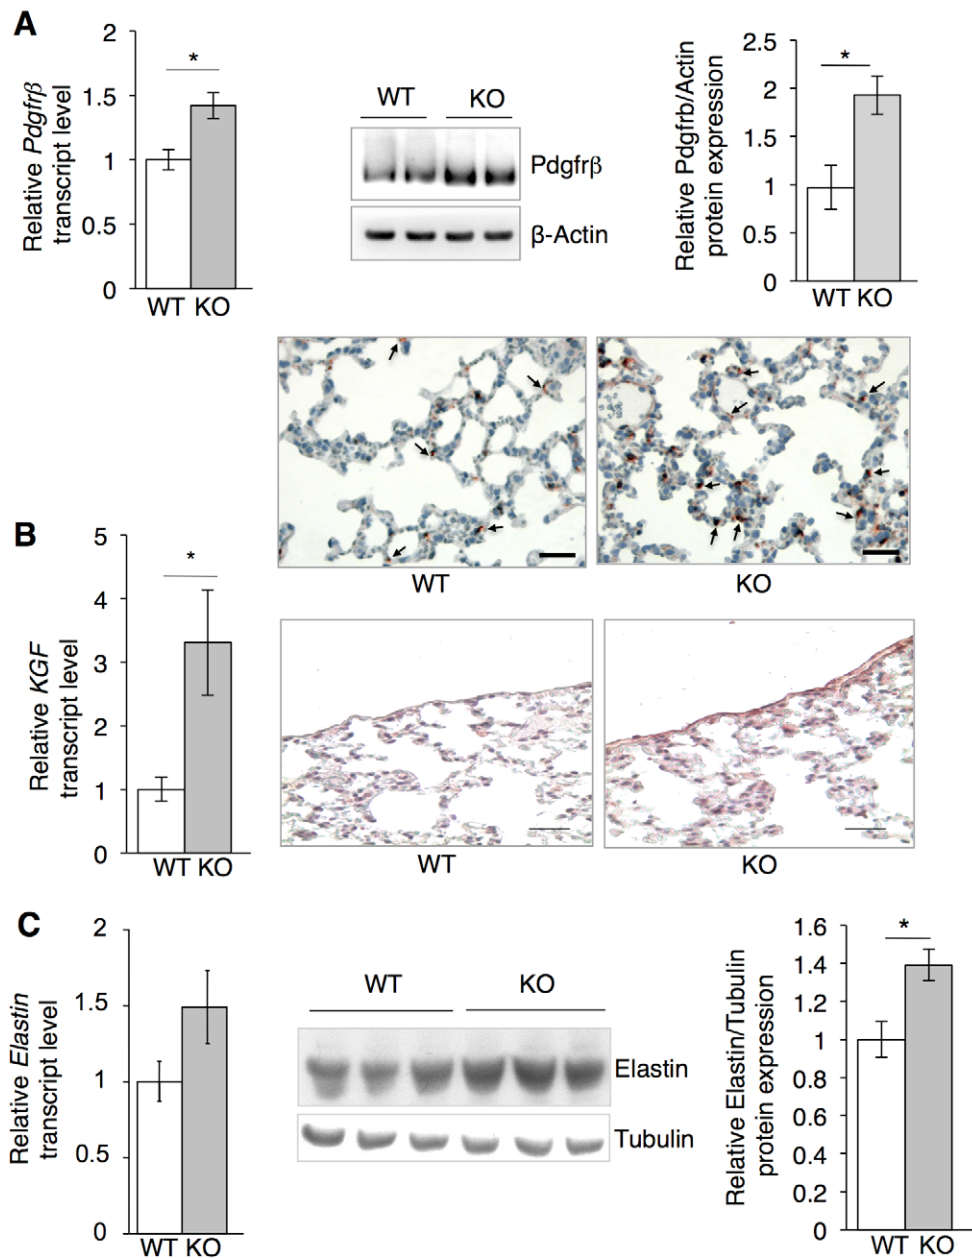

**Fig. S2:** Induction of alveolar maintenance programs in *Sesn2* KO mice *in vivo*. **A.** Upregulation of *Pdgfrβ* expression in *Sesn2* KO lungs. **Upper panel:** (Left) *Pdgfrβ* mRNA in lung tissue homogenates quantified by qRT-PCR. (Middle) Representative Western blot probed with anti-PGDFRβ antibody. (Right) Densitometric quantification of *Pdgfrβ* expression. **Lower panel:** Representative lung sections stained with anti-PGDFRβ antibody and counterstained with haematoxylin. *Pdgfrβ* expressing cells (arrows) have brown stained cytoplasm. Scale bar: 50 μm. **B.** Upregulation KGF expression in *Sesn2* KO lungs. **Left panel:** KGF mRNA quantified by qRT-PCT in lung tissue homogenates. **Right panel:** Representative lung sections stained with anti-KGF antibody and counterstained with haematoxylin. Scale bar: 50 μm. **C.** Upregulation of elastin expression in *Sesn2* KO lungs. **Left panel:** *Elastin* mRNA quantified by qRT-PCR. **Middle panel:** Representative Western blot of total lung tissue homogenates. **Right panel:** Densitometric quantification of elastin expression. All results are represented as means ± SEM of lungs from n = 4-5 individual mice per group. \*p<0.05.

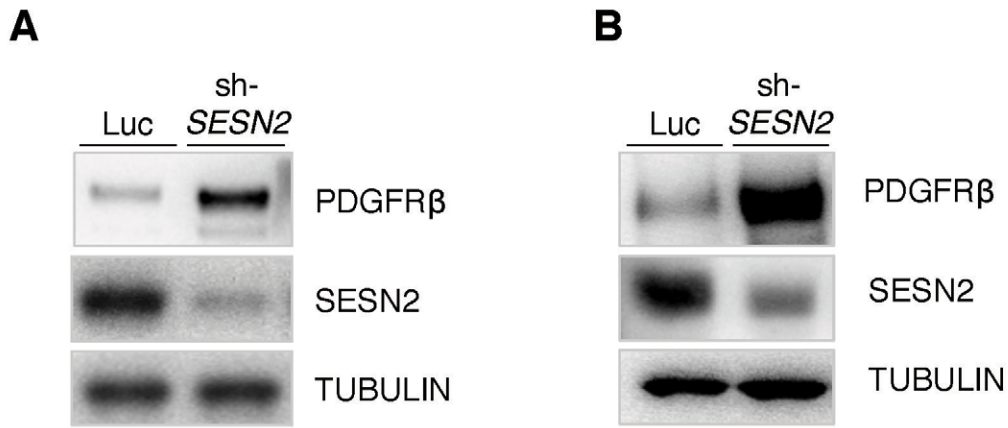

**Fig. S3:** Upregulation of PDGFR $\beta$  expression in MRC5 human fetal lung (A) and human adult primary lung fibroblasts (B) after lentiviral knockdown of *SESN2* shown by Western blotting using anti-PDGFR $\beta$ , anti-Sesn2 and anti-tubulin antibodies. *sh-SESN2*, *SESN2* shRNA; *Luc*, luciferase specific control shRNA.

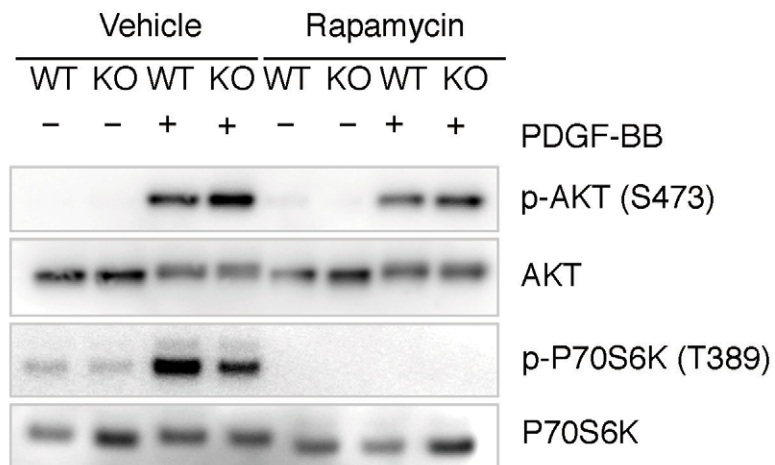

**Fig. S4:** Activation of mTORC1 signaling by PDGF-BB. Representative Western blot probed with anti-phospho-Akt (p-Akt), anti-Akt (Akt), anti-phospho-P70S6K (p-P70S6K), and anti-P70S6K (P706K) antibodies. Cell lysates prepared from serum-starved MLFs were exposed to 25 ng/ml recombinant human PDGF-BB for 20 min and to 100 nM rapamycin for 24 hours as indicated. Vehicle, DMSO.

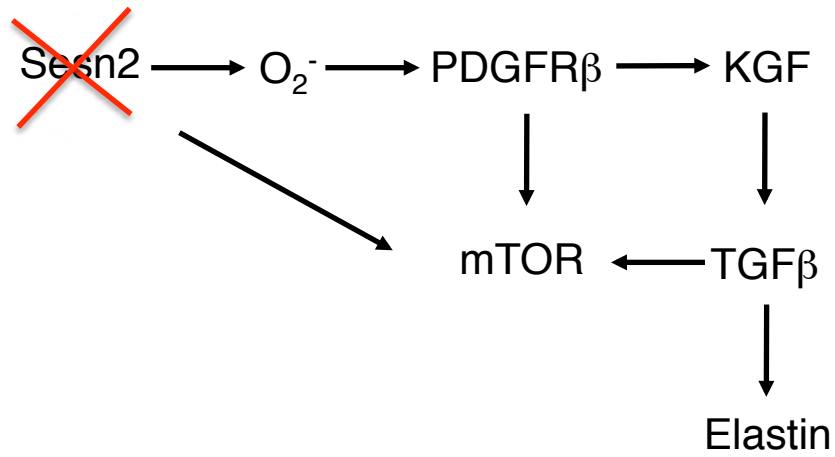

**Fig S5:** Schematic representation of signalling pathways affected by the Sesn2 mutation. Inactivation of Sesn2 derepresses mTOR and leads to an accumulation of superoxide anions ( $O_2^-$ ) which upregulate PDGFR $\beta$ . Amplification of PDGF signalling induces KGF secretion by lung parenchymal fibroblasts and stimulates the mTOR even further. KGF promotes ATII cell proliferation and secretion of TGF $\beta$  to upregulate elastin. Altogether, the activation of these pathways protect against pulmonary emphysema caused by cigarette smoke.

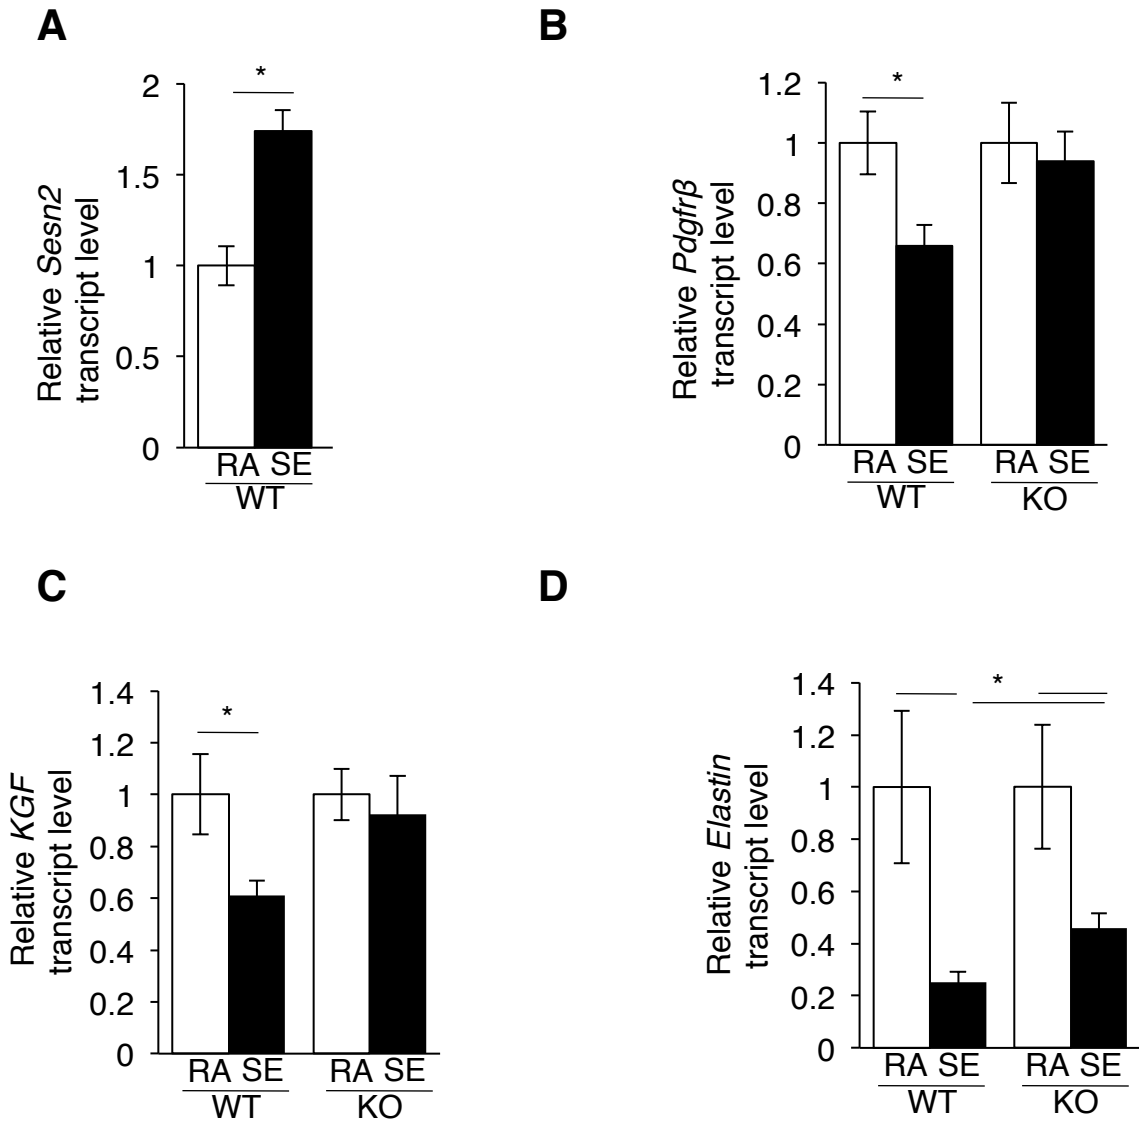

**Fig. S6:** Upregulation of *Sesn2* expression and repression of alveolar maintenance programs in smoke exposed mice. mRNA levels of *Sesn2* (A), *Pdgfrβ* (B), *KGF* (C) and *elastin* (D) quantified by qRT-PCR from lung tissue homogenates of WT- and *Sesn2* KO mice exposed to room air (RA) or cigarette smoke (SE). Results are represented as means  $\pm$  SEM of lungs from n= 5-7 mice per group. \*p<0.05.

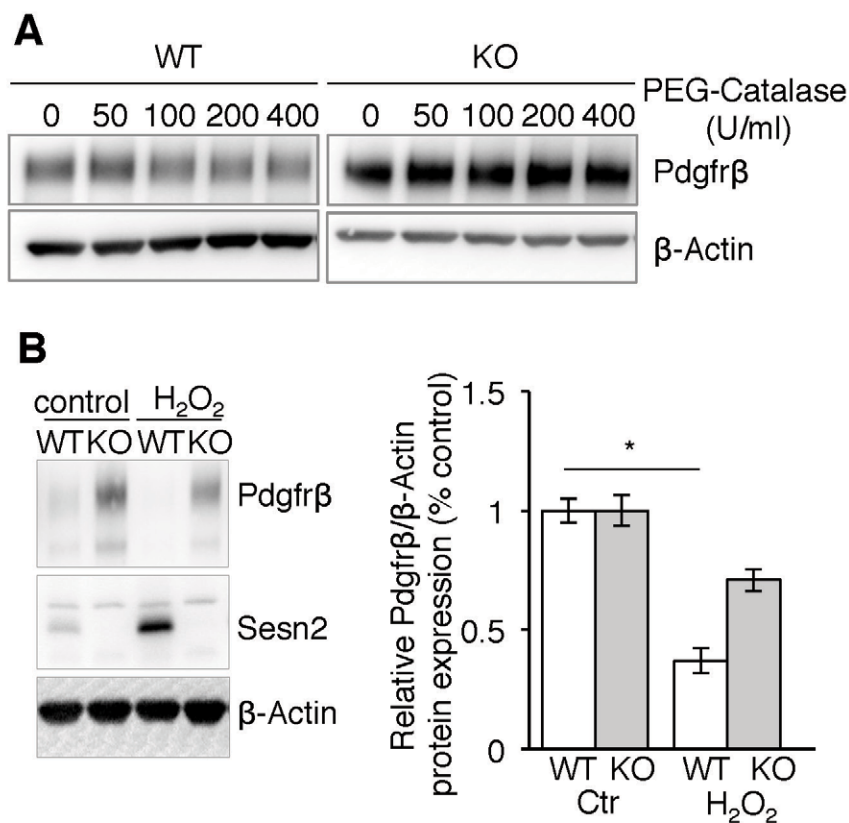

**Fig. S7:** ROS impact on PDGFR $\beta$  expression in MLFs. **(A)** Western blots showing Pdgr $\beta$  expression in MLFs treated PEG-Catalase for 48 hours. **(B and C)** Pdgr $\beta$  and Sesn2 expression in MLFs exposed for 6 hours to hydrogen peroxide (H<sub>2</sub>O<sub>2</sub>). **(B)** Representative Western blot. **(C)** Densitometric quantification of Pdgr $\beta$  expression. Results are represented as means  $\pm$  SEM of 3 separate experiments. \*p < 0.05.

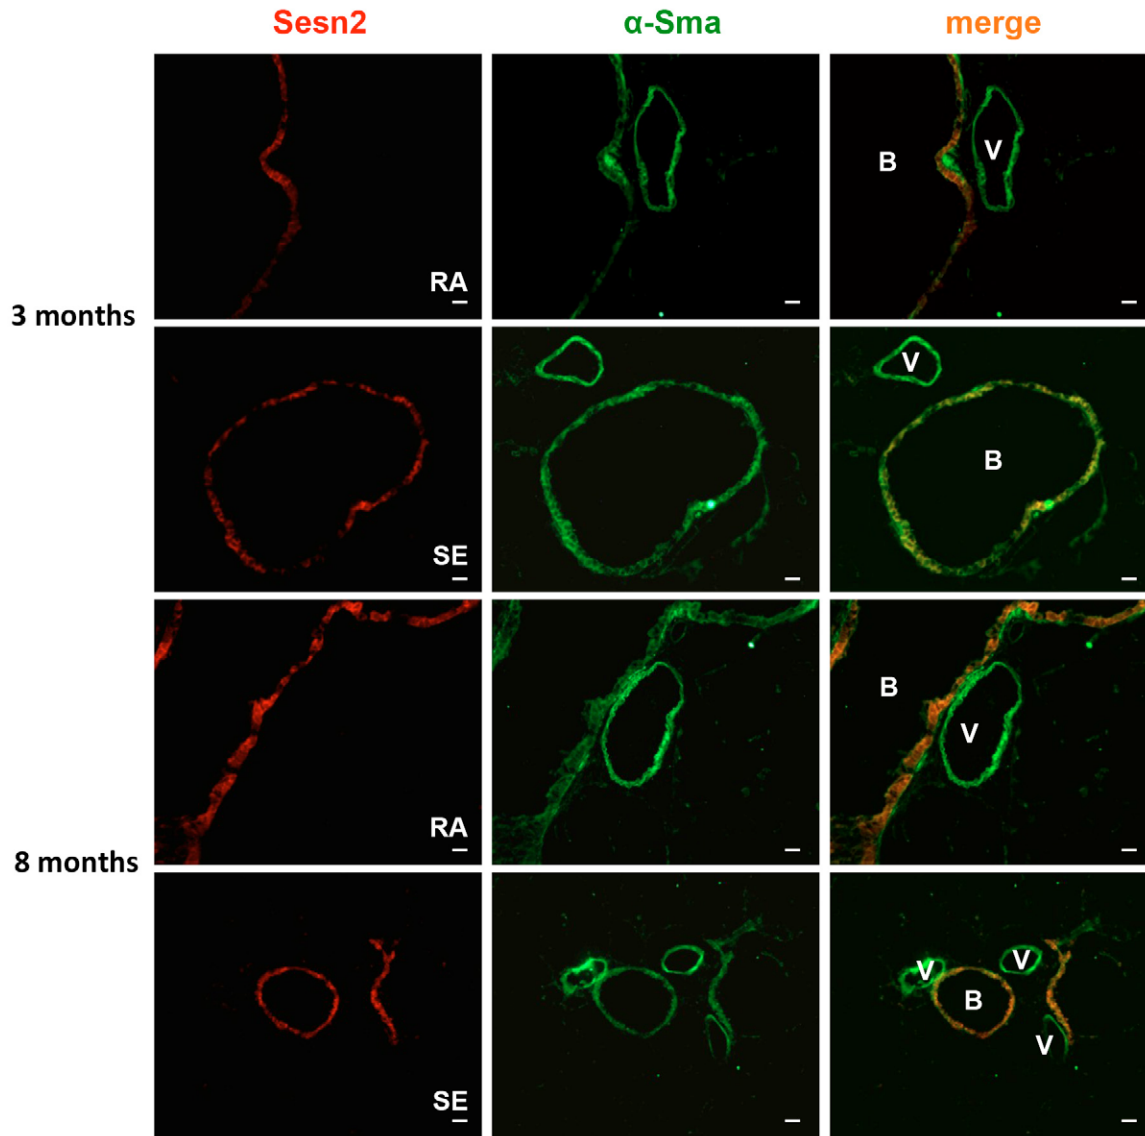

**Fig. S8:** Peribronchial *Sesn2* expression in lungs of wild type mice exposed to cigarette smoke. *Left panel:* *Sesn2* mRNA (red) visualized by fluorescence *in situ* hybridization. *Middle panel:* alpha-smooth muscle actin ( $\alpha$ -Sma) (green) visualized by immunostaining. *Right panel:* Co-localization of *Sesn2* and  $\alpha$ -Sma (orange) in subepithelial cells of the bronchial wall. Scale bar: 50  $\mu$ m. RA, room air; SE, smoke-exposed.

**Table S1:** Clinical characteristics of normal donors, smokers, and COPD patients\*

| No. | Patient         | Age | Sex | Pack/year | Diagnosis | FEV <sub>1</sub> /FVC (%) | FEV <sub>1</sub> (l) | FEV <sub>1</sub> /predicted (%) |
|-----|-----------------|-----|-----|-----------|-----------|---------------------------|----------------------|---------------------------------|
| 1   | Donor           | 24  | m   | -         | -         | -                         | -                    | -                               |
| 2   | Donor           | 52  | f   | -         | -         | -                         | -                    | -                               |
| 3   | Donor           | 61  | f   | -         | -         | -                         | -                    | -                               |
| 4   | Donor           | 26  | m   | -         | -         | -                         | -                    | -                               |
| 5   | Donor           | 29  | m   | -         | -         | -                         | -                    | -                               |
| 6   | Donor           | 55  | f   | -         | -         | -                         | -                    | -                               |
| 7   | Donor           | 40  | f   | -         | -         | -                         | -                    | -                               |
| 8   | Donor           | 42  | m   | -         | -         | -                         | -                    | -                               |
| 9   | Donor           | 23  | m   | -         | -         | -                         | -                    | -                               |
| 10  | Donor           | 63  | f   | -         | -         | -                         | -                    | -                               |
| 11  | Donor           | 87  | m   | -         | -         | -                         | -                    | -                               |
| 1   | Smoker+COPD     | 53  | m   | 39        | COPD IV   | 49                        | 1.56                 | 14                              |
| 2   | Smoker+COPD     | 48  | m   | 31        | COPD IV   | 45                        | 0.66                 | 19                              |
| 3   | Smoker+COPD     | 58  | m   | 70        | COPD IV   | 31                        | 0.86                 | 20                              |
| 4   | Smoker+COPD     | 58  | m   | 88        | COPD IV   | 40                        | 1.31                 | 32                              |
| 5   | Smoker+COPD     | 59  | m   | 5         | COPD IV   | 63                        | 0.76                 | 22                              |
| 6   | Smoker+COPD     | 56  | m   | 80        | COPD IV   | 29                        | 0.56                 | 16                              |
| 7   | Smoker+COPD     | 55  | m   | 35        | COPD IV   | 38                        | 0.55                 | 13                              |
| 8   | Smoker+COPD     | 51  | f   | 66        | COPD IV   | 61                        | 0.67                 | 23                              |
| 9   | Smoker+COPD     | 63  | m   | 37        | COPD IV   | 40                        | 0.93                 | 20                              |
| 10  | Smoker+COPD     | 55  | m   | 56        | COPD IV   | 42                        | 0.59                 | 16                              |
| 11  | Smoker+COPD     | 50  | f   | 60        | COPD IV   | 41                        | 0.57                 | 23                              |
| 12  | Smoker+COPD     | 48  | f   | 35        | COPD IV   | 58                        | 1.11                 | 35                              |
| 13  | Smoker+COPD     | 45  | m   | 60        | COPD IV   | 34                        | 1.00                 | 20                              |
| 1   | Smoker w/o COPD | 56  | f   | 50        | -         | 100                       | 4.10                 | 94                              |
| 2   | Smoker w/o COPD | 87  | m   | 10        | -         | 71                        | 3.20                 | 63                              |
| 3   | Smoker w/o COPD | 71  | m   | 60        | -         | 72                        | 2.10                 | 48                              |
| 4   | Smoker w/o COPD | 60  | f   | 10        | -         | 68                        | 3.80                 | 79                              |
| 5   | Smoker w/o COPD | 72  | f   | 50        | -         | 87                        | 3.40                 | 87                              |

\*COPD IV, Global Initiative for Chronic Obstructive Lung Disease (GOLD) stage IV; FEV<sub>1</sub>, forced expiratory volume per second; FVC, forced vital capacity.
